# Supplementary material
Source: publisher figshare collection journal article supplement (https://plos.figshare.com/articles/dataset/_/6494786)

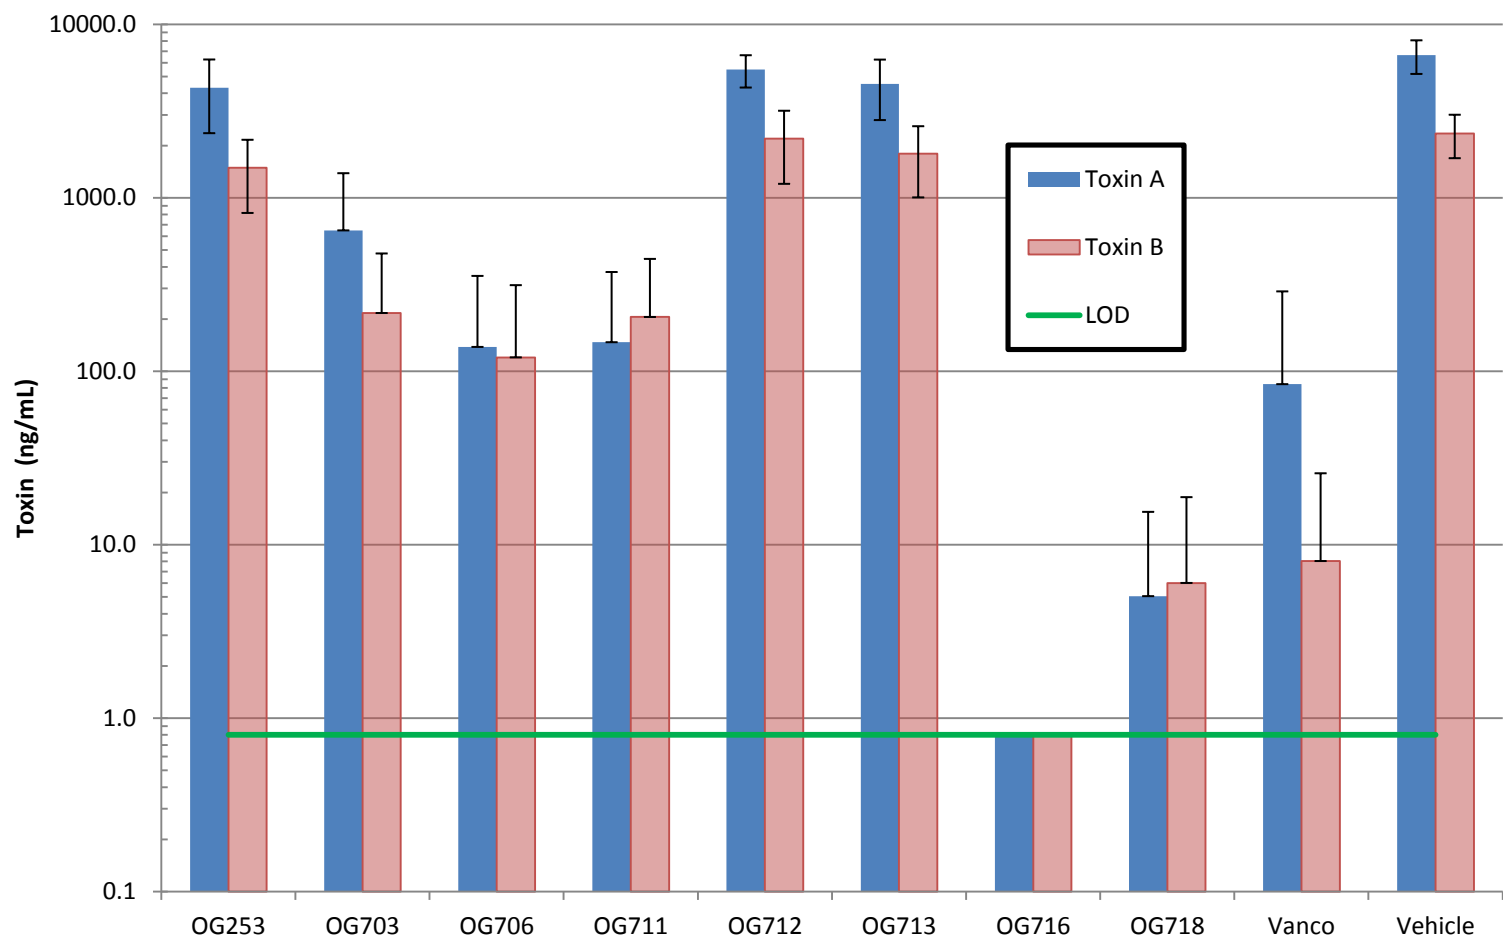

Supplement: Supplementary file [file 1]
