# Supplementary material
Source: publisher figshare collection journal article supplement (https://plos.figshare.com/articles/dataset/_/6494786)
Supplement: Supplementary file [file 1]

| Compound Name | Substitution relative to MU1140 | Calculated Mass (Da) | Mass by LC/MS (Da) | Minimum Inhibitory Concentration (µg/ml) <sup>1</sup> |                     |               |               |       |       |               |            |               |           |      |                   |                   | Forced Degradation        |                         |                |            |                |            |                |            | Solubility <sup>1</sup><br>5%<br>D-Mannitol (mg/ml) | Half Life <sup>3</sup> |      |  |
|---------------|---------------------------------|----------------------|--------------------|-------------------------------------------------------|---------------------|---------------|---------------|-------|-------|---------------|------------|---------------|-----------|------|-------------------|-------------------|---------------------------|-------------------------|----------------|------------|----------------|------------|----------------|------------|-----------------------------------------------------|------------------------|------|--|
|               |                                 |                      |                    | <i>M. luetus</i>                                      | <i>C. difficile</i> |               |               |       |       |               |            |               |           |      |                   |                   | 2 Days at 37°C            |                         | 7 Days at 37°C |            | 2 Days at 50°C |            | 7 Days at 50°C |            |                                                     |                        |      |  |
|               |                                 |                      |                    |                                                       | ATCC 9689           | ATCC BAA-1805 | ATCC BAA-1875 | 103-1 | 107-1 | ATCC BAA-1874 | ATCC 43597 | ATCC BAA-1808 | Range     | Mode | MIC <sub>50</sub> | MIC <sub>90</sub> | Δ Purity (%) <sup>2</sup> | Δ Conc (%) <sup>3</sup> | Δ Purity (%)   | Δ Conc (%) | Δ Purity (%)   | Δ Conc (%) | Δ Purity (%)   | Δ Conc (%) |                                                     |                        |      |  |
| OG253         | F1I                             | 2230.63              | 2230.14            | 0.0625                                                | 0.5                 | 0.5           | 0.25          | 0.06  | 0.25  | 0.25          | 0.25       | 0.25          | 0.06-0.5  | 0.25 | 0.25              | 0.5               | -1.44                     | -17.6                   | 0.54           | -14.3      | 0.39           | -13.6      | -3.65          | -21.5      | ≥ 24                                                | >1440                  | 14.4 |  |
| OG702         | F1A R13A                        | 2103.44              | 2103.53            | 0.250                                                 | 2                   | 2             | 2             | 0.5   | 4     | 4             | 2          | 1             | 0.5-4     | 2    | 2                 | 4                 | -1.57                     | -13.3                   | 0.60           | -16.5      | -0.10          | -5.2       | -2.25          | -19.2      | ND                                                  | ND                     | ND   |  |
| OG703         | F1I R13D                        | 2189.53              | 2189.34            | 0.0625                                                | 2                   | 1             | 1             | 0.5   | 2     | 0.5           | 1          | 1             | 0.5-2     | 1    | 1                 | 2                 | -0.97                     | -9.2                    | -1.04          | -13.4      | -1.74          | -15.0      | -4.79          | -30.3      | 7                                                   | >1440                  | 606  |  |
| OG704         | F1T R13G                        | 2119.44              | 2120.52            | 1.00                                                  | 8                   | 8             | 8             | 4     | 16    | 8             | 8          | 8             | 4-16      | 8    | 8                 | 16                | 0.50                      | -20.3                   | -1.90          | -18.1      | 0.43           | -18.5      | -6.14          | -45.8      | ND                                                  | ND                     | ND   |  |
| OG705         | F1L R13D                        | 2189.53              | 2189.06            | 0.0625                                                | 1                   | 1             | 1             | 0.5   | 2     | 1             | 1          | 1             | 0.5-2     | 1    | 1                 | 2                 | -0.29                     | -11.4                   | -0.61          | -12.3      | -1.32          | -11.2      | -3.22          | -26.0      | ND                                                  | >1440                  | >720 |  |
| OG706         | F1I R13N                        | 2188.55              | 2188.40            | 0.0625                                                | 0.5                 | 0.25          | 0.5           | 0.125 | 1     | 0.5           | 0.25       | 0.5           | 0.125-1   | 0.5  | 0.5               | 1                 | -1.15                     | -11.3                   | -6.64          | -20.0      | -8.05          | -23.0      | -21.46         | -50.1      | 18-24                                               | >1440                  | 708  |  |
| OG707         | F1I R13N G15A                   | 2202.58              | 2202.61            | 0.250                                                 | 8                   | 8             | 8             | 2     | 8     | 8             | 8          | 8             | 2-8       | 8    | 8                 | 8                 | -0.35                     | -11.2                   | -2.39          | -10.9      | -3.05          | -27.4      | -7.73          | -28.8      | ND                                                  | ND                     | ND   |  |
| OG708         | F1I W4M R13A                    | 2090.50              | 2090.54            | 0.500                                                 | 8                   | 4             | 4             | 1     | 4     | 4             | 4          | 8             | 1-8       | 4    | 4                 | 8                 | -0.39                     | -14.2                   | -1.90          | -22.9      | 0.99           | -29.2      | -5.03          | -50.8      | ND                                                  | ND                     | ND   |  |
| OG711         | F1I R13A                        | 2145.52              | 2145.06            | 0.125                                                 | 1                   | 0.25          | 0.5           | 0.25  | 1     | 0.5           | 0.5        | 0.25          | 0.25-1    | 0.25 | 0.5               | 1                 | -1.24                     | -12.5                   | -0.63          | -10.8      | -0.61          | -8.7       | -2.94          | -40.1      | 12-18                                               | >1440                  | >720 |  |
| OG712         | F1L R13N                        | 2188.55              | 2188.30            | 0.0625                                                | 0.5                 | 0.25          | 0.5           | 0.125 | 0.5   | 0.25          | 0.25       | 0.25          | 0.125-0.5 | 0.25 | 0.25              | 0.5               | -0.21                     | -4.6                    | -4.63          | -9.3       | -3.01          | -8.7       | -18.06         | -45.2      | 12                                                  | >1440                  | 587  |  |
| OG713         | F1L R13A                        | 2145.52              | 2145.05            | 0.125                                                 | 0.5                 | 0.25          | 0.5           | 0.25  | 0.5   | 0.5           | 0.5        | 0.5           | 0.25-0.5  | 0.5  | 0.5               | 0.5               | -0.06                     | -11.9                   | -0.56          | -8.8       | -1.51          | -16.9      | -6.98          | -41.0      | ND                                                  | >1440                  | 577  |  |
| OG715         | F1S R13N                        | 2162.47              | 2162.54            | 1.00                                                  | 16                  | 8             | 16            | 2     | 16    | 16            | 8          | 8             | 2-16      | 16   | 8                 | 16                | 1.09                      | -14.6                   | -2.08          | -25.3      | -3.19          | -33.8      | -21.26         | -84.3      | ND                                                  | ND                     | ND   |  |
| OG716         | F1V R13N                        | 2174.52              | 2174.40            | 0.0625                                                | 0.5                 | 0.25          | 0.5           | 0.25  | 0.5   | 0.5           | 0.25       | 0.25          | 0.25-0.5  | 0.5  | 0.25              | 0.5               | -0.31                     | -7.4                    | -5.20          | -14.8      | -3.67          | -16.9      | -19.77         | -47.0      | 12-18                                               | >1440                  | 552  |  |
| OG717         | F1G R13N                        | 2132.44              | 2132.53            | 1.00                                                  | 8                   | 8             | 8             | 2     | 16    | 16            | 8          | 8             | 2-16      | 8    | 8                 | 16                | 1.12                      | -4.8                    | -2.44          | -15.0      | -0.01          | -23.2      | -17.3          | -59.3      | ND                                                  | ND                     | ND   |  |
| OG718         | F1I R13N Y20F                   | 2172.55              | 2172.26            | 0.125                                                 | 0.5                 | 0.5           | 1             | 0.25  | 0.5   | 0.5           | 0.5        | 0.25          | 0.25-1    | 0.5  | 0.5               | 1                 | -2.07                     | -9.1                    | -7.42          | -21.0      | -4.90          | -29.4      | -12.84         | -43.8      | ≥ 24                                                | >1440                  | >720 |  |
| OG719         | F1A R13G                        | 2089.42              | 2089.52            | 0.500                                                 | 8                   | 8             | 8             | 2     | 8     | 8             | 4          | 8             | 2-8       | 8    | 8                 | 8                 | 0.54                      | -7.6                    | 1.22           | -12.0      | 0.92           | -23.6      | -1.92          | -31.3      | ND                                                  | ND                     | ND   |  |
|               |                                 |                      |                    | Vancomycin control                                    | 0.5                 | 1             | 0.5           | 1     | 4     | 0.5           | 0.5        | 0.5           | 0.5-4     | 0.5  | 0.5               | 4                 |                           |                         |                |            |                |            |                |            |                                                     |                        |      |  |
