# Supplementary material
Source: publisher figshare collection journal article supplement (https://plos.figshare.com/articles/dataset/_/6494786)
Supplement: Supplementary file [file 1]

| F1                                                                   | K2 | W4   | S5 | L6 | C7 | A12 | R13                          | G15 | Y20 | Number of variants |
|----------------------------------------------------------------------|----|------|----|----|----|-----|------------------------------|-----|-----|--------------------|
| Activity better than OG253 (>0.167 cm <sup>2</sup> zone of clearing) |    |      |    |    |    |     |                              |     |     |                    |
| L                                                                    |    |      |    |    |    |     | G                            |     |     | 1                  |
| A                                                                    |    |      |    |    |    |     | N, A, S, G, V, P             |     |     | 6                  |
| T                                                                    |    |      |    |    |    |     | A, G, V                      |     |     | 3                  |
| V                                                                    |    |      |    |    |    |     | N <sup>+</sup> , A, T, P, Q  |     |     | 5                  |
| G                                                                    |    |      |    |    |    |     | N, V                         |     |     | 2                  |
| I                                                                    | A  |      |    |    |    |     | A, T, V                      |     |     | 3                  |
| I                                                                    | A  |      |    |    |    |     | A, G, Q                      |     | F   | 3                  |
| I                                                                    | A  | K    |    |    |    |     | A                            |     |     | 1                  |
| I                                                                    | A  | K    |    |    |    |     | N, A                         |     | F   | 2                  |
| I                                                                    | T  | K    |    |    |    |     | A                            |     | F   | 1                  |
| I                                                                    |    | M    |    |    |    |     | N, A                         |     |     | 2                  |
| I                                                                    |    | I    |    |    |    |     | A                            |     |     | 1                  |
| I                                                                    |    |      |    |    |    |     | N, A                         | A   |     | 2                  |
| I                                                                    | A  |      |    |    |    |     | P                            |     | F   | 1                  |
| I                                                                    | A  | M    |    |    |    |     | N                            |     |     | 1                  |
| I                                                                    | A  | M    |    |    |    |     | A                            |     |     | 1                  |
| S                                                                    | A  |      |    | V  |    |     | A                            |     |     | 1                  |
| I                                                                    |    |      |    |    |    |     | H                            |     |     | 1                  |
| N                                                                    |    |      |    |    |    |     | I                            |     |     | 1                  |
| S                                                                    |    |      |    |    |    |     | G                            |     |     | 1                  |
| I                                                                    | T  |      |    |    |    |     | N                            |     |     | 1                  |
| I                                                                    | T  |      |    |    |    |     | N                            | A   |     | 1                  |
| I                                                                    |    |      |    |    |    |     | N, D, A, T, S, G, V, I, P, Q |     |     | 10                 |
| L                                                                    |    |      |    |    |    |     | N, D, A, T, S, P, Q, E       |     |     | 8                  |
| A                                                                    |    |      |    |    |    |     | D, T, K, Q, E, H             |     |     | 6                  |
| N                                                                    |    |      |    |    |    |     | K                            |     |     | 1                  |
| S                                                                    |    |      |    |    |    |     | N, A, T, K, V, I, Q, E       |     |     | 8                  |
| T                                                                    |    |      |    |    |    |     | N, S, I, Q, H                |     |     | 5                  |
| Y                                                                    |    |      |    |    |    |     | D, T, S, G, V, I, P, Q, E, H |     |     | 10                 |
| H                                                                    |    |      |    |    |    |     | N, A, T, K, S, V, I, Q, H    |     |     | 9                  |
| V                                                                    |    |      |    |    |    |     | D, K, V, I, E, H             |     |     | 6                  |
| G                                                                    |    |      |    |    |    |     | A, T, S, G, Q, H             |     |     | 6                  |
| L                                                                    |    |      |    |    |    |     | N, D, A                      |     | F   | 3                  |
| I                                                                    |    |      |    |    |    |     | N, D, A                      |     | F   | 3                  |
| I                                                                    | A  |      |    |    |    |     | K, S, I, P, Q, H             |     |     | 6                  |
| I                                                                    | A  |      |    |    |    |     | N, T, K, I, E, H             |     | F   | 6                  |
| I                                                                    | A  | K    |    |    |    |     | N, D                         |     |     | 2                  |
| I                                                                    | A  | K    |    |    |    |     | D, T, K                      |     | F   | 3                  |
| I                                                                    | T  | K    |    |    |    |     | N, A                         |     |     | 2                  |
| I                                                                    | T  | K    |    |    |    |     | N, D                         |     | F   | 2                  |
| V                                                                    | T  |      |    |    |    |     | N                            |     |     | 1                  |
| V                                                                    | T  | K    |    |    |    |     | A                            |     |     | 1                  |
| V                                                                    | T  | K    |    |    |    |     | N                            |     | F   | 1                  |
| I                                                                    |    | M, I |    |    |    |     | D                            |     |     | 2                  |
| I                                                                    |    |      |    | V  |    |     | D, A                         |     |     | 2                  |
| I                                                                    |    |      |    |    | T  |     | N                            |     |     | 1                  |
| I                                                                    |    |      |    |    |    |     | D                            | A   |     | 1                  |
| I                                                                    | T  | V, M |    |    |    |     | N                            |     |     | 2                  |
| I                                                                    | T  | M    |    |    |    |     | A                            |     |     | 1                  |
| I                                                                    | T  |      |    | V  |    |     | A                            |     |     | 1                  |
| I                                                                    | A  | V, I |    |    |    |     | A                            |     |     | 2                  |
| I                                                                    | A  |      |    | V  |    |     | N                            |     |     | 1                  |
| I                                                                    | A  |      |    |    |    |     | V                            |     | F   | 1                  |
| I                                                                    | T  | V    |    |    |    |     | A                            |     |     | 1                  |

| F1                                                                          | K2 | W4   | S5 | L6 | C7 | A12 | R13                                | G15 | Y20 | Number of variants |
|-----------------------------------------------------------------------------|----|------|----|----|----|-----|------------------------------------|-----|-----|--------------------|
| Activity less or similar to OG253 (<0.167 cm <sup>2</sup> zone of clearing) |    |      |    |    |    |     |                                    |     |     |                    |
| I                                                                           |    |      |    |    |    |     | K, E                               |     |     | 2                  |
| L                                                                           |    |      |    |    |    |     | K, V, H                            |     |     | 3                  |
| N                                                                           |    |      |    |    |    |     | A, T, S, G, P, Q, E                |     |     | 7                  |
| S                                                                           |    |      |    |    |    |     | D, P                               |     |     | 2                  |
| T                                                                           |    |      |    |    |    |     | D, T                               |     |     | 2                  |
| Y                                                                           |    |      |    |    |    |     | A, K                               |     |     | 2                  |
| H                                                                           |    |      |    |    |    |     | D, G, P, E                         |     |     | 4                  |
| P                                                                           |    |      |    |    |    |     | A, T, K, S, V, I, P, E, H          |     |     | 9                  |
| G                                                                           |    |      |    |    |    |     | D, E                               |     |     | 2                  |
| E                                                                           |    |      |    |    |    |     | N, D, A, T, K, S, G, V, I, P, E, H |     |     | 12                 |
| I                                                                           | A  |      |    |    |    |     | E                                  |     |     | 1                  |
| I                                                                           | A  | K    | F  |    |    |     | N, D                               |     |     | 2                  |
| I                                                                           | A  | K    | F  |    |    |     | A                                  |     |     | 1                  |
| I                                                                           | A  | K    | F  |    |    |     | N, D                               |     | F   | 2                  |
| I                                                                           | T  |      |    |    |    |     | D, A, T, L, S, G, V, I, P, Q, E, H |     |     | 12                 |
| I                                                                           | T  |      |    |    |    |     | N, D, A, S, G, V, I, P, Q, E       |     | F   | 10                 |
| I                                                                           | T  |      | F  | I  | G  |     | N, D, A                            |     | F   | 3                  |
| I                                                                           | T  |      | F  | I  | G  | G   | N, D, A                            |     | F   | 3                  |
| I                                                                           | T  | K    |    |    |    |     | D                                  |     |     | 1                  |
| V                                                                           | T  |      |    |    |    |     | D, A                               |     |     | 2                  |
| V                                                                           | T  |      |    |    |    |     | N, D, A                            |     | F   | 3                  |
| V                                                                           | T  | K    |    |    |    |     | N, D                               |     |     | 2                  |
| V                                                                           | T  | K    |    |    |    |     | D, A                               |     | F   | 2                  |
| I                                                                           |    | I    |    |    |    |     | N                                  |     |     | 1                  |
| I                                                                           |    |      |    |    | T  |     | D                                  |     |     | 1                  |
| I                                                                           | T  | V, M |    |    |    |     | D                                  |     |     | 2                  |
| I                                                                           | T  | I    |    |    |    |     | N, D, A                            |     |     | 3                  |
| I                                                                           | T  |      |    | V  |    |     | N, D                               |     |     | 2                  |
| I                                                                           | T  |      |    |    | T  |     | N, D, A                            |     |     | 3                  |
| I                                                                           | T  |      |    |    |    |     | D                                  | A   |     | 1                  |
| I                                                                           | A  | V    |    |    |    |     | N                                  |     |     | 1                  |
| I                                                                           | A  | V, M |    |    |    |     | D                                  |     |     | 2                  |
| I                                                                           | A  |      |    | V  |    |     | D                                  |     |     | 1                  |
| I                                                                           | A  |      |    |    | T  |     | N, D, A                            |     |     | 3                  |
| I                                                                           | A  |      |    |    |    |     | N, D, A                            | A   |     | 3                  |
| F1                                                                          | K2 | W4   | S5 | L6 | C7 | A12 | R13                                | G15 | Y20 | Number of variants |
| Failed to construct strain for technical or biological reasons              |    |      |    |    |    |     |                                    |     |     |                    |
| L, A                                                                        |    |      |    |    |    |     | I                                  |     |     | 2                  |
| N                                                                           |    |      |    |    |    |     | N, D, V, H                         |     |     | 4                  |
| S                                                                           |    |      |    |    |    |     | S, H                               |     |     | 2                  |
| T                                                                           |    |      |    |    |    |     | K, P, E                            |     |     | 3                  |
| Y                                                                           |    |      |    |    |    |     | N                                  |     |     | 1                  |
| P                                                                           |    |      |    |    |    |     | N, D, G, Q                         |     |     | 4                  |
| V                                                                           |    |      |    |    |    |     | S, G                               |     |     | 2                  |
| G                                                                           |    |      |    |    |    |     | K, I, P                            |     |     | 3                  |
| E                                                                           |    |      |    |    |    |     | Q                                  |     |     | 1                  |
| I                                                                           | A  |      |    |    |    |     | N, D, G                            |     |     | 3                  |
| I                                                                           | A  |      |    |    |    |     | D, S                               |     | F   | 2                  |
| I                                                                           | A  | K    | F  |    |    |     | A                                  |     | F   | 1                  |
| I                                                                           | T  |      |    |    |    |     | H                                  |     | F   | 1                  |
| I                                                                           |    |      |    | V  |    |     | N                                  |     |     | 1                  |
| I                                                                           |    |      |    |    | T  |     | A                                  |     |     | 1                  |
| I                                                                           | T  |      |    |    |    |     | A                                  | A   |     | 1                  |
| I                                                                           | A  | I    |    |    |    |     | N, D                               |     |     | 2                  |
