# Supplementary material
Source: publisher figshare collection journal article supplement (https://plos.figshare.com/articles/dataset/_/6494786)
Supplement: Supplementary file [file 1]

| Clone No. | Ogxxx | F1 | K2 | W4 | S5 | L6 | A12 | R13 | G15 | Y20 |
|-----------|-------|----|----|----|----|----|-----|-----|-----|-----|
| 1         |       | I  |    |    |    |    |     | N   |     |     |
| 2         | OG703 | I  |    |    |    |    |     | D   |     |     |
| 3         | OG711 | I  |    |    |    |    |     | A   |     |     |
| 4         |       | I  |    |    |    |    |     | T   |     |     |
| 5         |       | I  |    |    |    |    |     | K   |     |     |
| 6         |       | I  |    |    |    |    |     | S   |     |     |
| 7         |       | I  |    |    |    |    |     | G   |     |     |
| 8         |       | I  |    |    |    |    |     | V   |     |     |
| 9         |       | I  |    |    |    |    |     | I   |     |     |
| 10        |       | I  |    |    |    |    |     | P   |     |     |
| 11        |       | I  |    |    |    |    |     | Q   |     |     |
| 12        |       | I  |    |    |    |    |     | E   |     |     |
| 13        |       | I  |    |    |    |    |     | H   |     |     |
| 14        | OG712 | L  |    |    |    |    |     | N   |     |     |
| 15        |       | L  |    |    |    |    |     | D   |     |     |
| 16        | OG713 | L  |    |    |    |    |     | A   |     |     |
| 17        |       | L  |    |    |    |    |     | T   |     |     |
| 18        |       | L  |    |    |    |    |     | K   |     |     |
| 19        |       | L  |    |    |    |    |     | S   |     |     |
| 20        |       | L  |    |    |    |    |     | G   |     |     |
| 21        |       | L  |    |    |    |    |     | V   |     |     |
| 22        |       | L  |    |    |    |    |     | I   |     |     |
| 23        |       | L  |    |    |    |    |     | P   |     |     |
| 24        |       | L  |    |    |    |    |     | Q   |     |     |
| 25        |       | L  |    |    |    |    |     | E   |     |     |
| 26        |       | L  |    |    |    |    |     | H   |     |     |
| 27        |       | A  |    |    |    |    |     | N   |     |     |
| 28        | OG705 | A  |    |    |    |    |     | D   |     |     |
| 29        | OG702 | A  |    |    |    |    |     | A   |     |     |
| 30        |       | A  |    |    |    |    |     | T   |     |     |
| 31        |       | A  |    |    |    |    |     | K   |     |     |
| 32        |       | A  |    |    |    |    |     | S   |     |     |
| 33        | OG719 | A  |    |    |    |    |     | G   |     |     |
| 34        |       | A  |    |    |    |    |     | V   |     |     |
| 35        |       | A  |    |    |    |    |     | I   |     |     |
| 36        |       | A  |    |    |    |    |     | P   |     |     |
| 37        |       | A  |    |    |    |    |     | Q   |     |     |
| 38        |       | A  |    |    |    |    |     | E   |     |     |
| 39        |       | A  |    |    |    |    |     | H   |     |     |
| 40        |       | N  |    |    |    |    |     | N   |     |     |
| 41        |       | N  |    |    |    |    |     | D   |     |     |
| 42        |       | N  |    |    |    |    |     | A   |     |     |
| 43        |       | N  |    |    |    |    |     | T   |     |     |

44  
45  
46  
47  
48  
49  
50  
51  
52  
53  
54  
55  
56  
57  
58  
59  
60  
61  
62  
63  
64  
65  
66  
67  
68  
69  
70  
71  
72  
73  
74  
75  
76  
77  
78  
79  
80  
81  
82  
83  
84  
85  
86  
87

|   |  |  |  |  |  |   |  |  |
|---|--|--|--|--|--|---|--|--|
| N |  |  |  |  |  | K |  |  |
| N |  |  |  |  |  | S |  |  |
| N |  |  |  |  |  | G |  |  |
| N |  |  |  |  |  | V |  |  |
| N |  |  |  |  |  | I |  |  |
| N |  |  |  |  |  | P |  |  |
| N |  |  |  |  |  | Q |  |  |
| N |  |  |  |  |  | E |  |  |
| N |  |  |  |  |  | H |  |  |
| S |  |  |  |  |  | N |  |  |
| S |  |  |  |  |  | D |  |  |
| S |  |  |  |  |  | A |  |  |
| S |  |  |  |  |  | T |  |  |
| S |  |  |  |  |  | K |  |  |
| S |  |  |  |  |  | S |  |  |
| S |  |  |  |  |  | G |  |  |
| S |  |  |  |  |  | V |  |  |
| S |  |  |  |  |  | I |  |  |
| S |  |  |  |  |  | P |  |  |
| S |  |  |  |  |  | Q |  |  |
| S |  |  |  |  |  | E |  |  |
| S |  |  |  |  |  | H |  |  |
| T |  |  |  |  |  | N |  |  |
| T |  |  |  |  |  | D |  |  |
| T |  |  |  |  |  | A |  |  |
| T |  |  |  |  |  | T |  |  |
| T |  |  |  |  |  | K |  |  |
| T |  |  |  |  |  | S |  |  |
| T |  |  |  |  |  | G |  |  |
| T |  |  |  |  |  | V |  |  |
| T |  |  |  |  |  | I |  |  |
| T |  |  |  |  |  | P |  |  |
| T |  |  |  |  |  | Q |  |  |
| T |  |  |  |  |  | E |  |  |
| T |  |  |  |  |  | H |  |  |
| Y |  |  |  |  |  | N |  |  |
| Y |  |  |  |  |  | D |  |  |
| Y |  |  |  |  |  | A |  |  |
| Y |  |  |  |  |  | T |  |  |
| Y |  |  |  |  |  | K |  |  |
| Y |  |  |  |  |  | S |  |  |
| Y |  |  |  |  |  | G |  |  |
| Y |  |  |  |  |  | V |  |  |
| Y |  |  |  |  |  | I |  |  |

|     |   |  |  |  |  |  |   |  |  |
|-----|---|--|--|--|--|--|---|--|--|
| 88  | Y |  |  |  |  |  | P |  |  |
| 89  | Y |  |  |  |  |  | Q |  |  |
| 90  | Y |  |  |  |  |  | E |  |  |
| 91  | Y |  |  |  |  |  | H |  |  |
| 92  | H |  |  |  |  |  | N |  |  |
| 93  | H |  |  |  |  |  | D |  |  |
| 94  | H |  |  |  |  |  | A |  |  |
| 95  | H |  |  |  |  |  | T |  |  |
| 96  | H |  |  |  |  |  | K |  |  |
| 97  | H |  |  |  |  |  | S |  |  |
| 98  | H |  |  |  |  |  | G |  |  |
| 99  | H |  |  |  |  |  | V |  |  |
| 100 | H |  |  |  |  |  | I |  |  |
| 101 | H |  |  |  |  |  | P |  |  |
| 102 | H |  |  |  |  |  | Q |  |  |
| 103 | H |  |  |  |  |  | E |  |  |
| 104 | H |  |  |  |  |  | H |  |  |
| 105 | P |  |  |  |  |  | N |  |  |
| 106 | P |  |  |  |  |  | D |  |  |
| 107 | P |  |  |  |  |  | A |  |  |
| 108 | P |  |  |  |  |  | T |  |  |
| 109 | P |  |  |  |  |  | K |  |  |
| 110 | P |  |  |  |  |  | S |  |  |
| 111 | P |  |  |  |  |  | G |  |  |
| 112 | P |  |  |  |  |  | V |  |  |
| 113 | P |  |  |  |  |  | I |  |  |
| 114 | P |  |  |  |  |  | P |  |  |
| 115 | P |  |  |  |  |  | Q |  |  |
| 116 | P |  |  |  |  |  | E |  |  |
| 117 | P |  |  |  |  |  | H |  |  |
| 118 | V |  |  |  |  |  | N |  |  |
| 119 | V |  |  |  |  |  | D |  |  |
| 120 | V |  |  |  |  |  | A |  |  |
| 121 | V |  |  |  |  |  | T |  |  |
| 122 | V |  |  |  |  |  | K |  |  |
| 123 | V |  |  |  |  |  | S |  |  |
| 124 | V |  |  |  |  |  | G |  |  |
| 125 | V |  |  |  |  |  | V |  |  |
| 126 | V |  |  |  |  |  | I |  |  |
| 127 | V |  |  |  |  |  | P |  |  |
| 128 | V |  |  |  |  |  | Q |  |  |
| 129 | V |  |  |  |  |  | E |  |  |
| 130 | V |  |  |  |  |  | H |  |  |
| 131 | G |  |  |  |  |  | N |  |  |

OG716

|     |   |   |  |  |  |   |  |   |
|-----|---|---|--|--|--|---|--|---|
| 132 | G |   |  |  |  | D |  |   |
| 133 | G |   |  |  |  | A |  |   |
| 134 | G |   |  |  |  | T |  |   |
| 135 | G |   |  |  |  | K |  |   |
| 136 | G |   |  |  |  | S |  |   |
| 137 | G |   |  |  |  | G |  |   |
| 138 | G |   |  |  |  | V |  |   |
| 139 | G |   |  |  |  | I |  |   |
| 140 | G |   |  |  |  | P |  |   |
| 141 | G |   |  |  |  | Q |  |   |
| 142 | G |   |  |  |  | E |  |   |
| 143 | G |   |  |  |  | H |  |   |
| 144 | E |   |  |  |  | N |  |   |
| 145 | E |   |  |  |  | D |  |   |
| 146 | E |   |  |  |  | A |  |   |
| 147 | E |   |  |  |  | T |  |   |
| 148 | E |   |  |  |  | K |  |   |
| 149 | E |   |  |  |  | S |  |   |
| 150 | E |   |  |  |  | G |  |   |
| 151 | E |   |  |  |  | V |  |   |
| 152 | E |   |  |  |  | I |  |   |
| 153 | E |   |  |  |  | P |  |   |
| 154 | E |   |  |  |  | Q |  |   |
| 155 | E |   |  |  |  | E |  |   |
| 156 | E |   |  |  |  | H |  |   |
| 157 | L |   |  |  |  | N |  | F |
| 158 | L |   |  |  |  | D |  | F |
| 159 | L |   |  |  |  | A |  | F |
| 160 | I |   |  |  |  | N |  | F |
| 161 | I |   |  |  |  | D |  | F |
| 162 | I |   |  |  |  | A |  | F |
| 163 | I | A |  |  |  | N |  |   |
| 164 | I | A |  |  |  | D |  |   |
| 165 | I | A |  |  |  | A |  |   |
| 166 | I | A |  |  |  | T |  |   |
| 167 | I | A |  |  |  | K |  |   |
| 168 | I | A |  |  |  | S |  |   |
| 169 | I | A |  |  |  | G |  |   |
| 170 | I | A |  |  |  | V |  |   |
| 171 | I | A |  |  |  | I |  |   |
| 172 | I | A |  |  |  | P |  |   |
| 173 | I | A |  |  |  | Q |  |   |
| 174 | I | A |  |  |  | E |  |   |
| 175 | I | A |  |  |  | H |  |   |

OG718

|     |   |   |   |   |  |  |   |  |   |
|-----|---|---|---|---|--|--|---|--|---|
| 176 | I | A |   |   |  |  | N |  | F |
| 177 | I | A |   |   |  |  | D |  | F |
| 178 | I | A |   |   |  |  | A |  | F |
| 179 | I | A |   |   |  |  | T |  | F |
| 180 | I | A |   |   |  |  | K |  | F |
| 181 | I | A |   |   |  |  | S |  | F |
| 182 | I | A |   |   |  |  | G |  | F |
| 183 | I | A |   |   |  |  | V |  | F |
| 184 | I | A |   |   |  |  | I |  | F |
| 185 | I | A |   |   |  |  | P |  | F |
| 186 | I | A |   |   |  |  | Q |  | F |
| 187 | I | A |   |   |  |  | E |  | F |
| 188 | I | A |   |   |  |  | H |  | F |
| 189 | I | A | K |   |  |  | N |  |   |
| 190 | I | A | K |   |  |  | D |  |   |
| 191 | I | A | K |   |  |  | A |  |   |
| 192 | I | A | K |   |  |  | N |  | F |
| 193 | I | A | K |   |  |  | D |  | F |
| 194 | I | A | K |   |  |  | A |  | F |
| 195 | I | A | K | F |  |  | N |  |   |
| 196 | I | A | K | F |  |  | D |  |   |
| 197 | I | A | K | F |  |  | A |  |   |
| 198 | I | A | K | F |  |  | N |  | F |
| 199 | I | A | K | F |  |  | D |  | F |
| 200 | I | A | K | F |  |  | A |  | F |
| 201 | I | T |   |   |  |  | N |  |   |
| 202 | I | T |   |   |  |  | D |  |   |
| 203 | I | T |   |   |  |  | A |  |   |
| 204 | I | T |   |   |  |  | T |  |   |
| 205 | I | T |   |   |  |  | K |  |   |
| 206 | I | T |   |   |  |  | S |  |   |
| 207 | I | T |   |   |  |  | G |  |   |
| 208 | I | T |   |   |  |  | V |  |   |
| 209 | I | T |   |   |  |  | I |  |   |
| 210 | I | T |   |   |  |  | P |  |   |
| 211 | I | T |   |   |  |  | Q |  |   |
| 212 | I | T |   |   |  |  | E |  |   |
| 213 | I | T |   |   |  |  | H |  |   |
| 214 | I | T |   |   |  |  | N |  | F |
| 215 | I | T |   |   |  |  | D |  | F |
| 216 | I | T |   |   |  |  | A |  | F |
| 217 | I | T |   |   |  |  | T |  | F |
| 218 | I | T |   |   |  |  | K |  | F |
| 219 | I | T |   |   |  |  | S |  | F |

|     |   |   |   |   |   |   |   |   |   |
|-----|---|---|---|---|---|---|---|---|---|
| 220 | I | T |   |   |   |   | G |   | F |
| 221 | I | T |   |   |   |   | V |   | F |
| 222 | I | T |   |   |   |   | I |   | F |
| 223 | I | T |   |   |   |   | P |   | F |
| 224 | I | T |   |   |   |   | Q |   | F |
| 225 | I | T |   |   |   |   | E |   | F |
| 226 | I | T |   |   |   |   | H |   | F |
| 227 | I | T | F | I | G |   | N |   | F |
| 228 | I | T | F | I | G |   | D |   | F |
| 229 | I | T | F | I | G |   | A |   | F |
| 230 | I | T | F | I | G | G | N |   | F |
| 231 | I | T | F | I | G | G | D |   | F |
| 232 | I | T | F | I | G | G | A |   | F |
| 233 | I | T | K |   |   |   | N |   |   |
| 234 | I | T | K |   |   |   | D |   |   |
| 235 | I | T | K |   |   |   | A |   |   |
| 236 | I | T | K |   |   |   | N |   | F |
| 237 | I | T | K |   |   |   | D |   | F |
| 238 | I | T | K |   |   |   | A |   | F |
| 239 | V | T |   |   |   |   | N |   |   |
| 240 | V | T |   |   |   |   | D |   |   |
| 241 | V | T |   |   |   |   | A |   |   |
| 242 | V | T |   |   |   |   | N |   | F |
| 243 | V | T |   |   |   |   | D |   | F |
| 244 | V | T |   |   |   |   | A |   | F |
| 245 | V | T | K |   |   |   | N |   |   |
| 246 | V | T | K |   |   |   | D |   |   |
| 247 | V | T | K |   |   |   | A |   |   |
| 248 | V | T | K |   |   |   | N |   | F |
| 249 | V | T | K |   |   |   | D |   | F |
| 250 | V | T | K |   |   |   | A |   | F |
| 251 | I |   | M |   |   |   | N |   |   |
| 252 | I |   | M |   |   |   | D |   |   |
| 253 | I |   | M |   |   |   | A |   |   |
| 254 | I |   | I |   |   |   | N |   |   |
| 255 | I |   | I |   |   |   | D |   |   |
| 256 | I |   | I |   |   |   | A |   |   |
| 257 | I |   |   |   | V |   | N |   |   |
| 258 | I |   |   |   | V |   | D |   |   |
| 259 | I |   |   |   | V |   | A |   |   |
| 260 | I |   |   |   |   | T | N |   |   |
| 261 | I |   |   |   |   | T | D |   |   |
| 262 | I |   |   |   |   | T | A |   |   |
| 263 | I |   |   |   |   |   | N | A |   |

OG708

OG707

|     |   |   |   |  |   |   |   |   |  |
|-----|---|---|---|--|---|---|---|---|--|
| 264 | I |   |   |  |   |   | D | A |  |
| 265 | I |   |   |  |   |   | A | A |  |
| 266 | I | T | V |  |   |   | N |   |  |
| 267 | I | T | V |  |   |   | D |   |  |
| 268 | I | T | V |  |   |   | A |   |  |
| 269 | I | T | M |  |   |   | N |   |  |
| 270 | I | T | M |  |   |   | D |   |  |
| 271 | I | T | M |  |   |   | A |   |  |
| 272 | I | T | I |  |   |   | N |   |  |
| 273 | I | T | I |  |   |   | D |   |  |
| 274 | I | T | I |  |   |   | A |   |  |
| 275 | I | T |   |  | V |   | N |   |  |
| 276 | I | T |   |  | V |   | D |   |  |
| 277 | I | T |   |  | V |   | A |   |  |
| 278 | I | T |   |  |   | T | N |   |  |
| 279 | I | T |   |  |   | T | D |   |  |
| 280 | I | T |   |  |   | T | A |   |  |
| 281 | I | T |   |  |   |   | N | A |  |
| 282 | I | T |   |  |   |   | D | A |  |
| 283 | I | T |   |  |   |   | A | A |  |
| 284 | I | A | V |  |   |   | N |   |  |
| 285 | I | A | V |  |   |   | D |   |  |
| 286 | I | A | V |  |   |   | A |   |  |
| 287 | I | A | M |  |   |   | N |   |  |
| 288 | I | A | M |  |   |   | D |   |  |
| 289 | I | A | M |  |   |   | A |   |  |
| 290 | I | A | I |  |   |   | N |   |  |
| 291 | I | A | I |  |   |   | D |   |  |
| 292 | I | A | I |  |   |   | A |   |  |
| 293 | I | A |   |  | V |   | N |   |  |
| 294 | I | A |   |  | V |   | D |   |  |
| 295 | I | A |   |  | V |   | A |   |  |
| 296 | I | A |   |  |   | T | N |   |  |
| 297 | I | A |   |  |   | T | D |   |  |
| 298 | I | A |   |  |   | T | A |   |  |
| 299 | I | A |   |  |   |   | N | A |  |
| 300 | I | A |   |  |   |   | D | A |  |
| 301 | I | A |   |  |   |   | A | A |  |



























---

---

---

---

---

---

---

---

---

---

---

---

---

---

---

---

---

---

---

---

---

---

---

---

---

---

---

---

---

---

---

---

---

---



---

---

---

---

---

---

---

---

---

---

---

---

---

---

---





---

---

---

---

---

---

---

---

---

---

---

---

---

---

---

---

---

---

---

---

---



---

---

---

---

---

---

---

---

---

---

---

---

---

---

---

---

---

---

---

---

---

---

---

---

---

---





---

---

---

---

---

---

---

---

---

---

---

---

---

---

---



---

---

---

---

---

---

---

---

---

---

---

---

---

---

---

---

---

---

---

---

---

---

---

---

---

---

---

---

---

---

---

---





---

---

---

---

---

---

---

---

---

---



---

---

---

---

---

---

---

---

---

---

---

---

---

---

---

---

---

---

---

---

---

---

---

---

---

---

---

---

---

---

---

---

---

---

---

---

---





---

---

---

---

---

---



---

---

---

---

---

---

---

---

---

---

---

---

---

---

---

---

---

---

---

---

---

---

---

---

---

---

---

---

---

---

---

---

---

---

---

---

---

---

---

---

---





---

---

---



---

---

---

---

---

---

---

---

---

---

---

---

---

---

---

---

---

---

---

---

---

---

---

---

---

---

---

---

---

---

---

---

---

---

---

---

---

---

---

---

---

---

---

---







---

---

---

---

---

---

---

---

---

---

---

---

---

---

---

---

---

---

---

---

---

---

---

---

---

---

---

---

---

---

---

---

---

---

---

---

---

---

---

---

---

---

---

---

---

---

---







---

---

---

---

---

---

---

---

---

---

---

---

---

---

---

---

---

---

---

---

---

---

---

---

---

---

---

---

---

---

---

---

---

---

---

---

---

---

---

---

---

---

---

---

---

---

---







---

---

---

---

---

---

---

---

---

---

---

---

---

---

---

---

---

---

---

---

---

---

---

---

---

---

---

---

---

---

---

---

---

---



---

---

---

---

---

---

---

---

---

---

---

---
